# Supplementary material for: Association of Risk Factors With Patient-Reported Voice and Speech Symptoms Among Long-term Survivors of Oropharyngeal Cancer
Source: PubMed Central journal article supplement (PMC8103354; doi:10.1001/jamaoto.2021.0698), 2021-05-06
Supplement: jamaotolaryngolheadnecksurg-e210698-s001.pdf [file jamaotolaryngolheadnecksurg-e210698-s001.pdf]

## Supplemental Online Content

Aggarwal P, Hutcheson KA, Garden AS, et al. Association of risk factors with patient-reported voice and speech symptoms among long-term survivors of oropharyngeal cancer. *JAMA Otolaryngol Head Neck Surg*. Published online May 6, 2021. doi:10.1001/jamaoto.2021.0698

**eTable.** Frequency distribution of voice and speech symptom scores (N=906)

This supplemental material has been provided by the authors to give readers additional information about their work.

**eTable. Frequency distribution of voice and speech symptom scores (N=906)**

| <b>MDASI-HN Voice/Speech Score</b> | <b>Number of Patients</b> | <b>Proportion</b> |
|------------------------------------|---------------------------|-------------------|
| <b>0</b>                           | 480                       | 0.54              |
| <b>1</b>                           | 132                       | 0.15              |
| <b>2</b>                           | 88                        | 0.10              |
| <b>3</b>                           | 45                        | 0.05              |
| <b>4</b>                           | 23                        | 0.03              |
| <b>5</b>                           | 36                        | 0.04              |
| <b>6</b>                           | 13                        | 0.01              |
| <b>7</b>                           | 22                        | 0.02              |
| <b>8</b>                           | 21                        | 0.02              |
| <b>9</b>                           | 5                         | 0.01              |
| <b>10</b>                          | 16                        | 0.02              |
| <b>Missing</b>                     | 25                        | 0.03              |

Abbreviations: MDASI-HN; MD Anderson Symptom Inventory - Head and Neck Cancer Module
